# Supplementary material for: An Octopus-Derived Peptide with Antidiuretic Activity in Rats
Source: MDPI journal article supplement (doi:10.3390/md20050328), 2022-05-17
Supplement: s1 [file s1]

# Supplementary Material

## TABLE OF CONTENTS

|                                                                                             |          |
|---------------------------------------------------------------------------------------------|----------|
| <b>SUPPLEMENTARY FIGURES.....</b>                                                           | <b>1</b> |
| <b>Figure S1.</b> Optimal condition for weight of rats in the antidiuretic test. ....       | <b>2</b> |
| <b>Figure S2.</b> Optimal condition for breeding cage of rats in the antidiuretic test..... | <b>3</b> |
| <b>Figure S3.</b> Optimal condition for fasting time of rats in the antidiuretic test.....  | <b>4</b> |

## SUPPLEMENTARY FIGURES

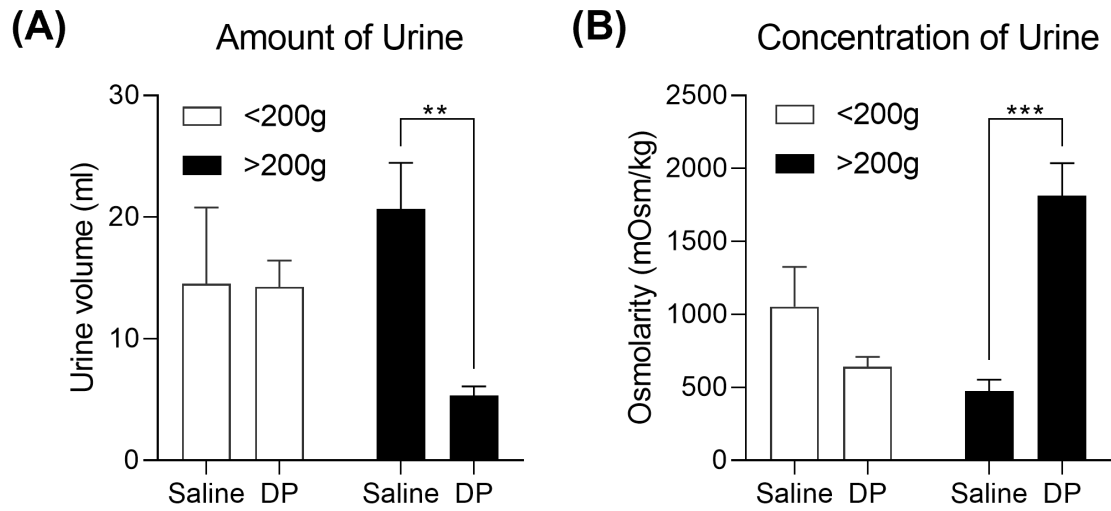

Figure S1. Optimal rat weight for the antidiuretic effect. (A) Male rats above 200 g produced less urine after a single microvenous injection of desmopressin (DP); however, male rats under 200 g exhibited no change in urine volume (unpaired t test \*\*P = 0.0026, n=6 for each group). (B) Male rats above 200 g had lower osmolarity after a single microvenous injection of desmopressin (DP); however, male rats under 200 g had no change in osmolarity (unpaired t test \*\*\*P = 0.0002, n=6 for each group).

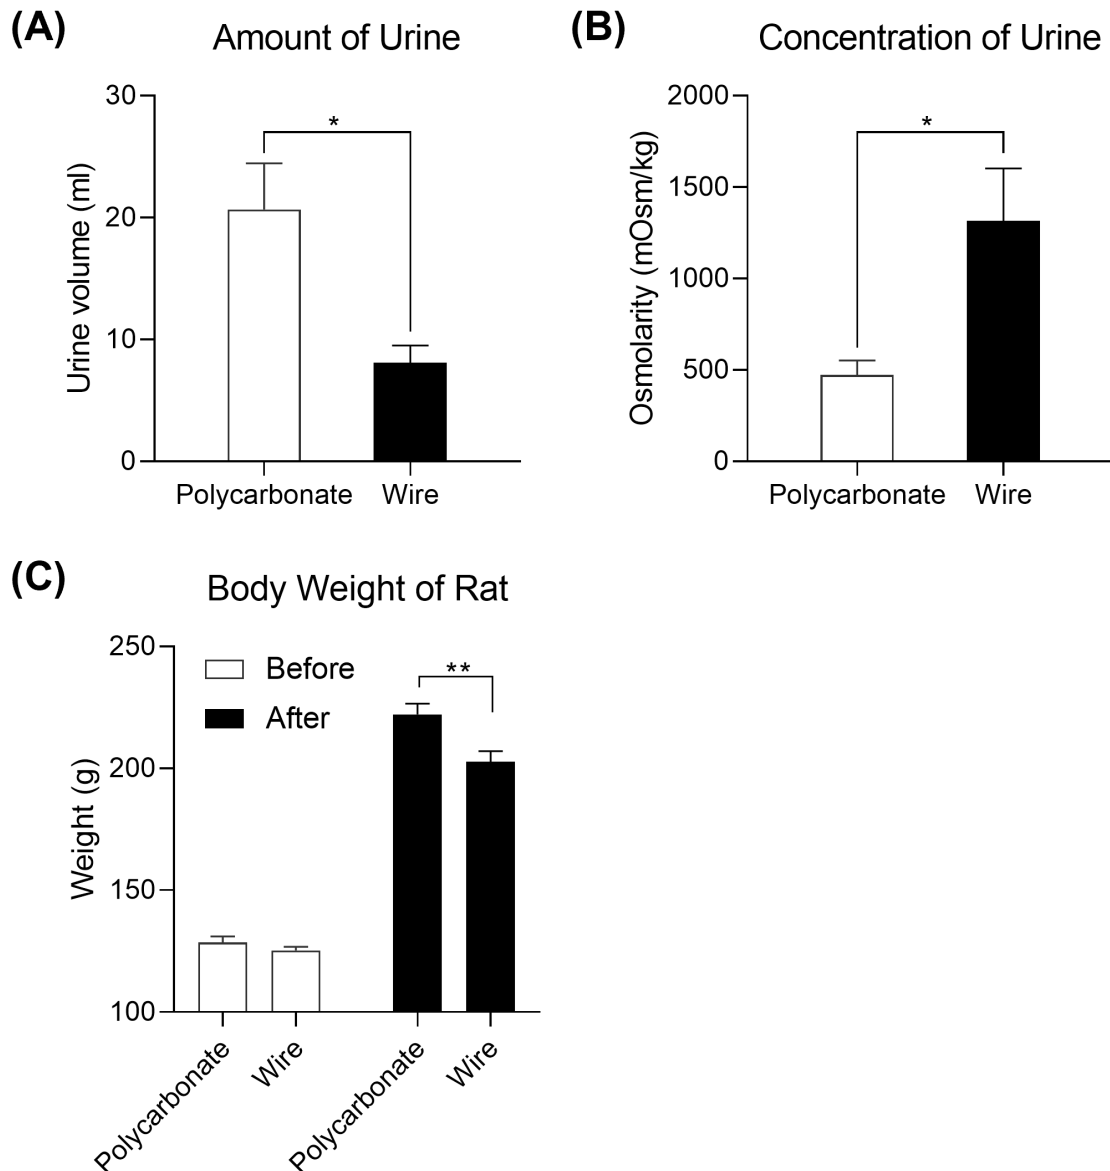

Figure S2. The optimal housing rat cage conditions for antidiuretic effects. (A,B) Male rats housed in polycarbonate-bottomed cages had different urine volumes (A, unpaired t test  $**P = 0.01$ ,  $n=6$  for each group) and osmotic pressures (B, unpaired t test  $*P = 0.02$ ,  $n=6$  for each group) than rats breeding in wire-bottomed cages. (C) Rats kept in wire-bottom cages weighed less than those kept in polycarbonate cages (unpaired t test  $**P = 0.0099$ ,  $n=6$  for each group).

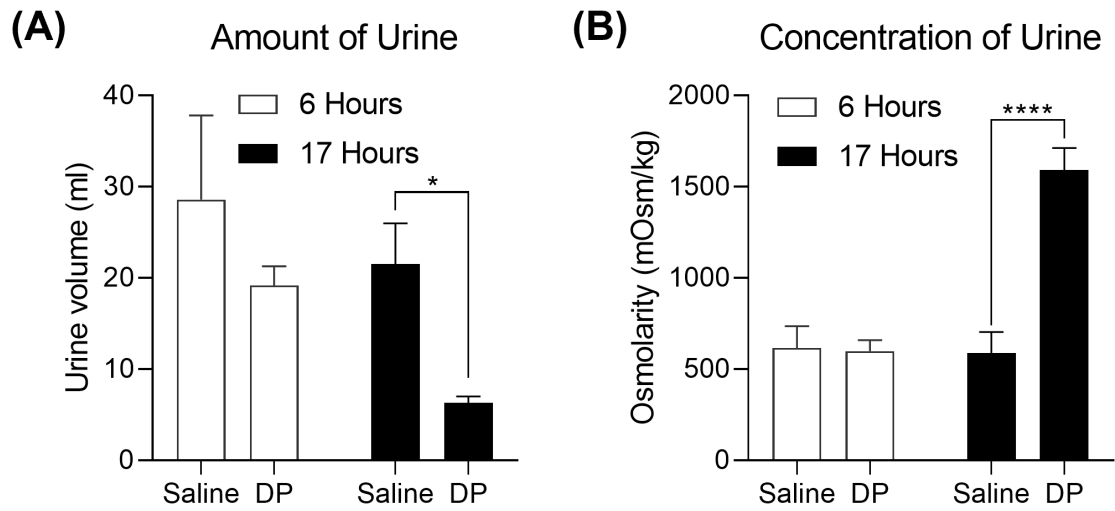

Figure S3. The optimal fasting time for the antidiuretic effect in rats. Time-dependent variation in dietary inhibition prior to microintravenous administration of desmopressin (DP). (A,B) The 17-hour fasting time showed DP-reduced urine volume (A, unpaired t test \*P = 0.0112, n=6 for 6 hours and n=8 for 17 hours) and osmolarity (B, unpaired t test \*\*\*\*P < 0.0001, n=6 for 6 hours and n=8 for 17 hours)
